# Supplementary material for: Impact of the COVID-19 Pandemic on Objectively Measured Physical Activity and Sedentary Behavior Among Overweight Young Adults: Yearlong Longitudinal Analysis
Source: PubMed Central journal article supplement (PMC8614391; doi:10.2196/28317), 2021-11-24

# Structural break detection for steps

BIC and Residual Sum of Squares

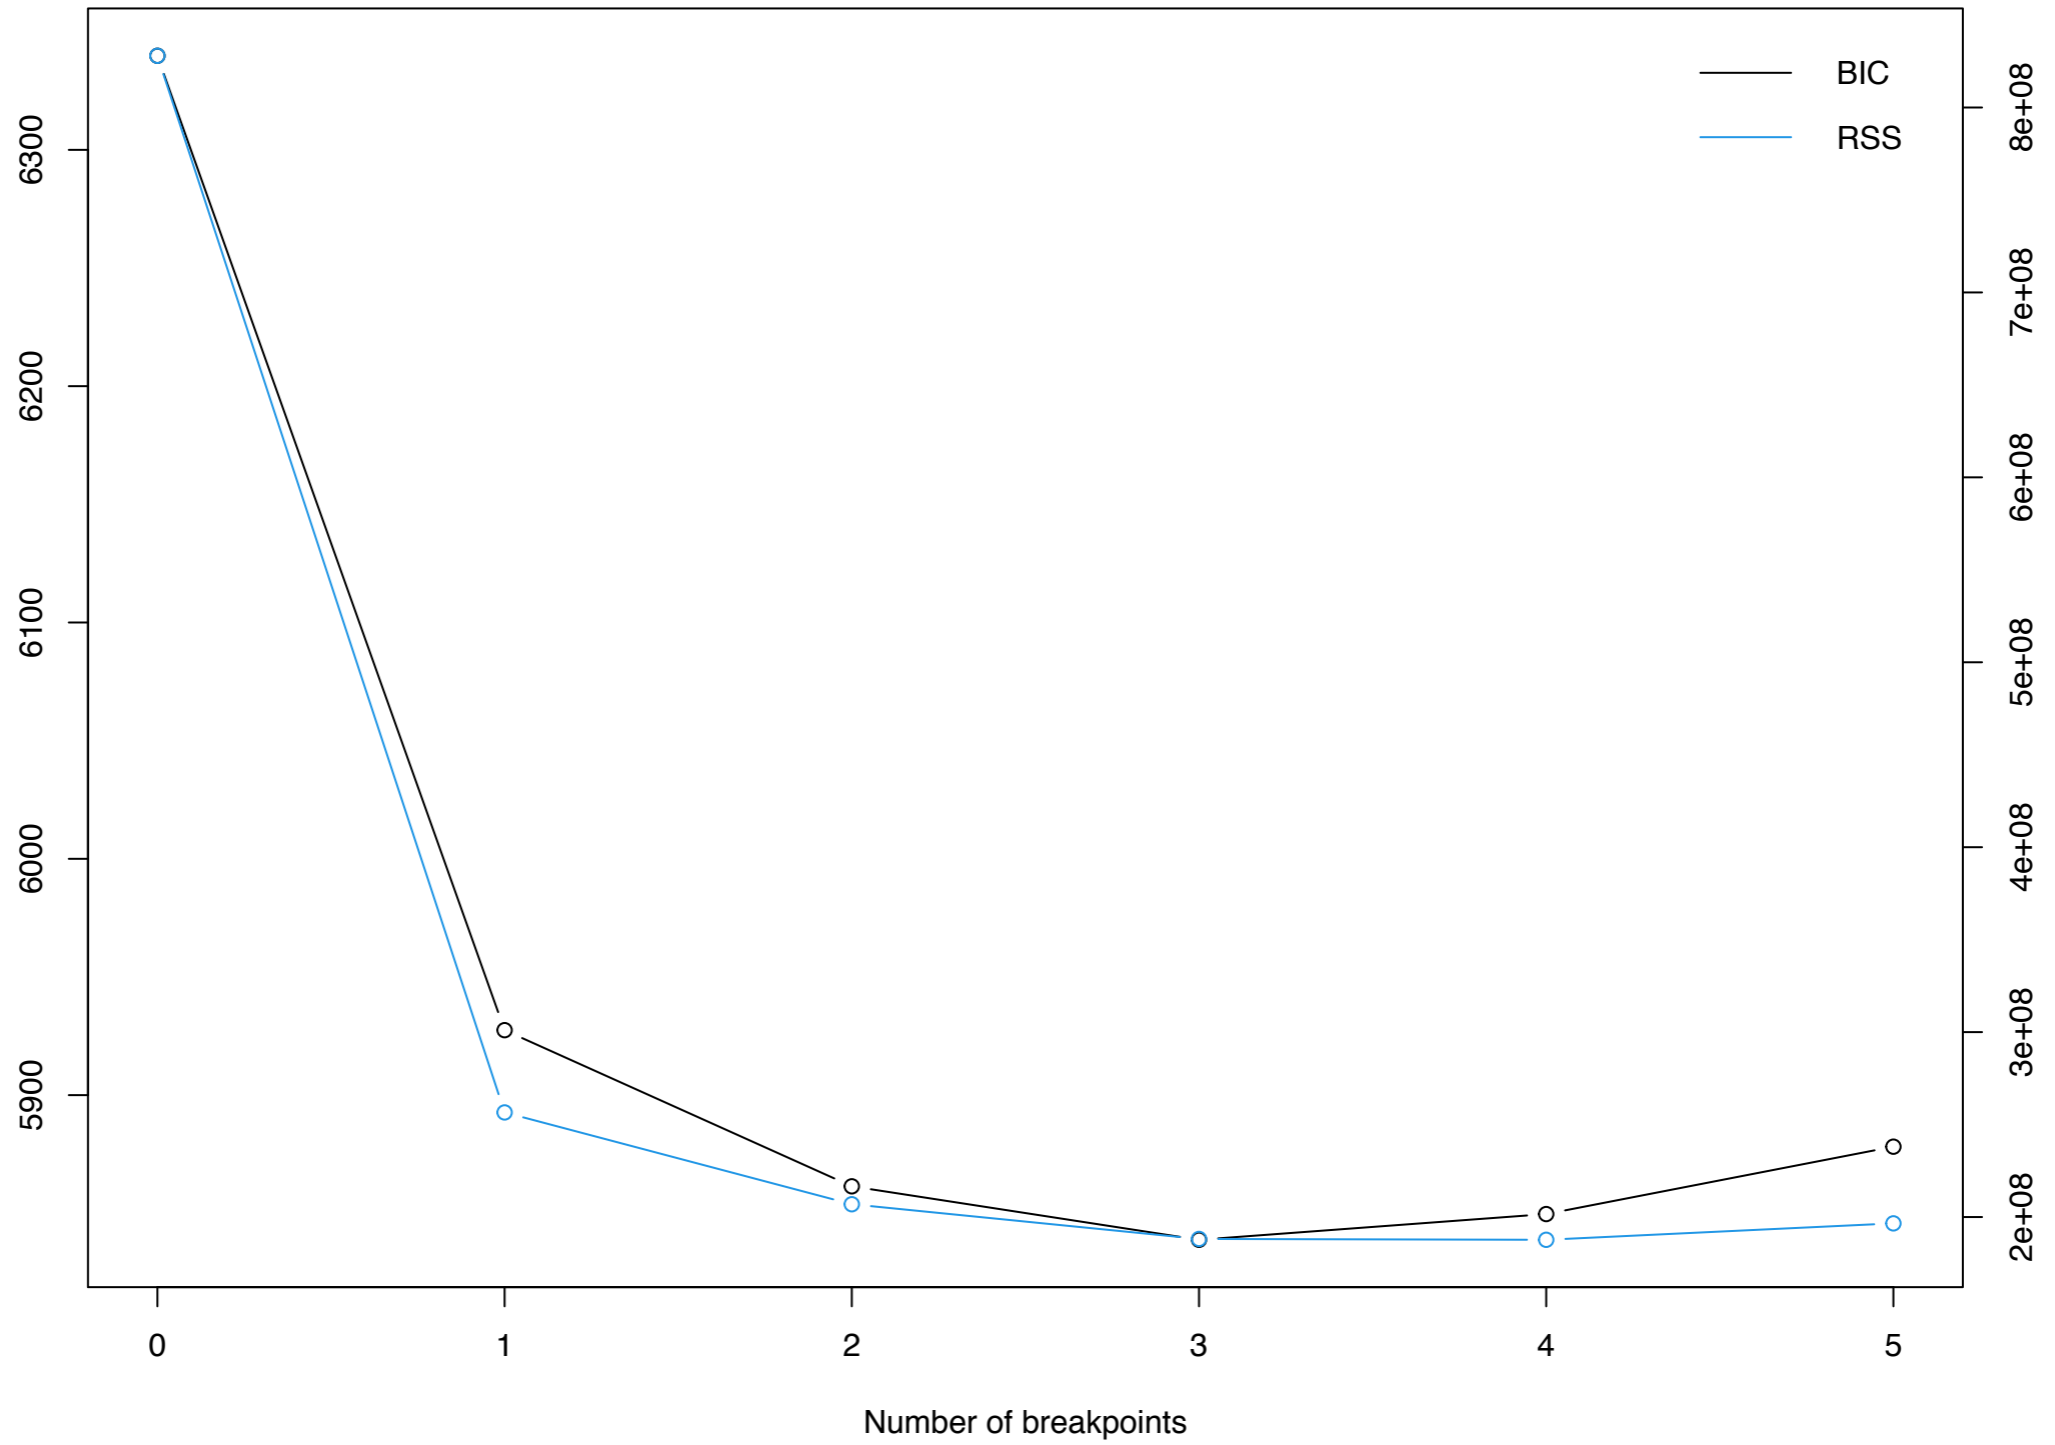

# Structural break detection for steps

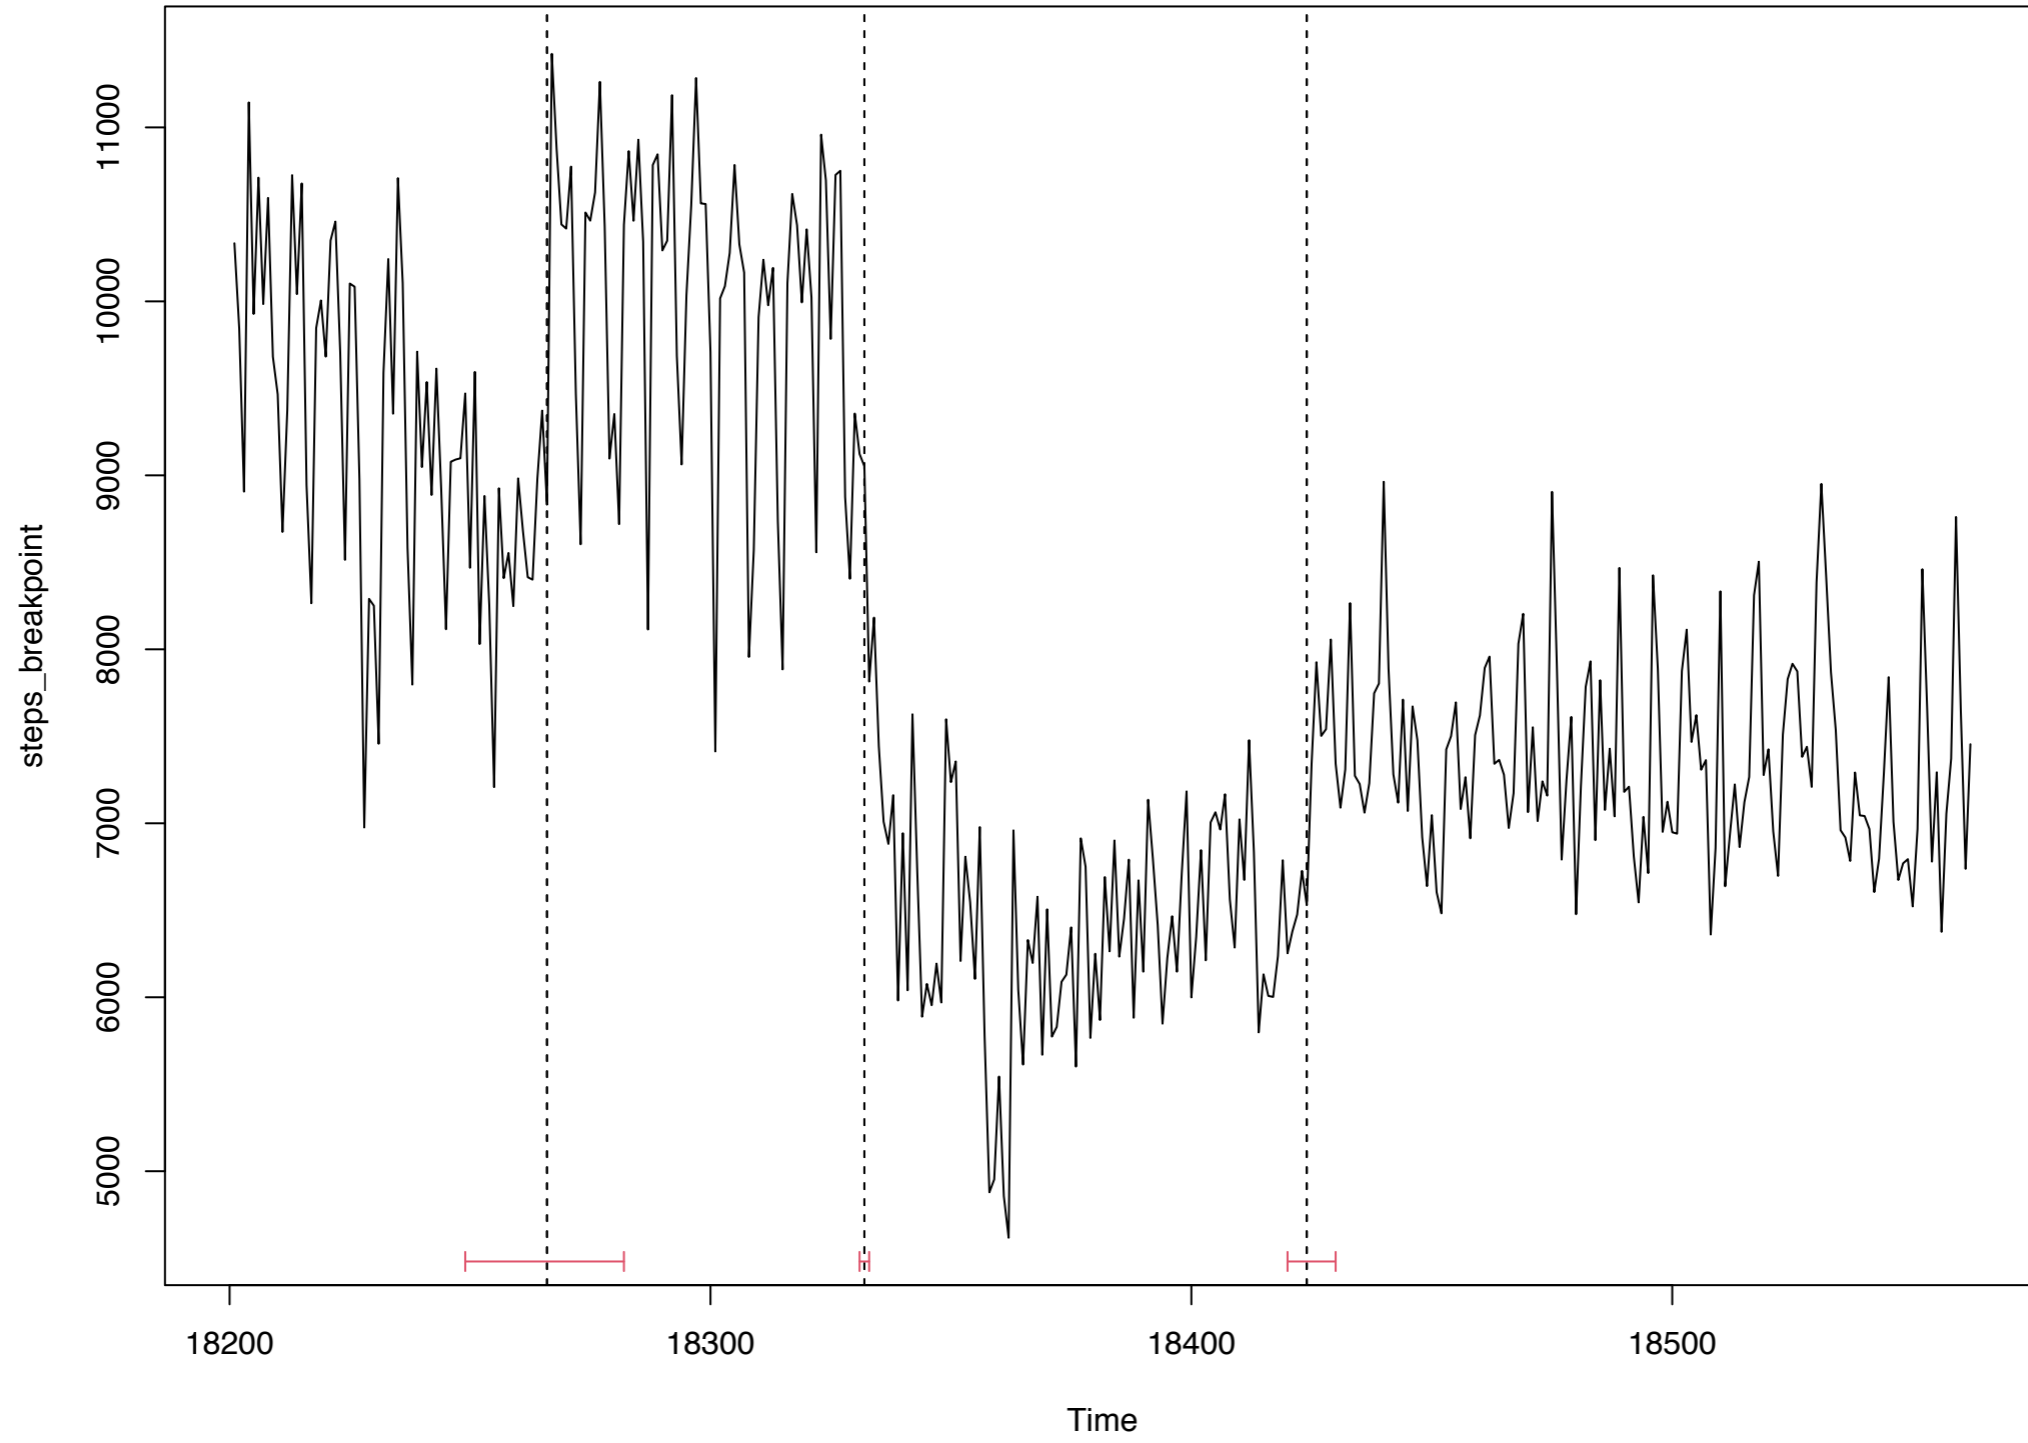

# Structural break detection for light PA

BIC and Residual Sum of Squares

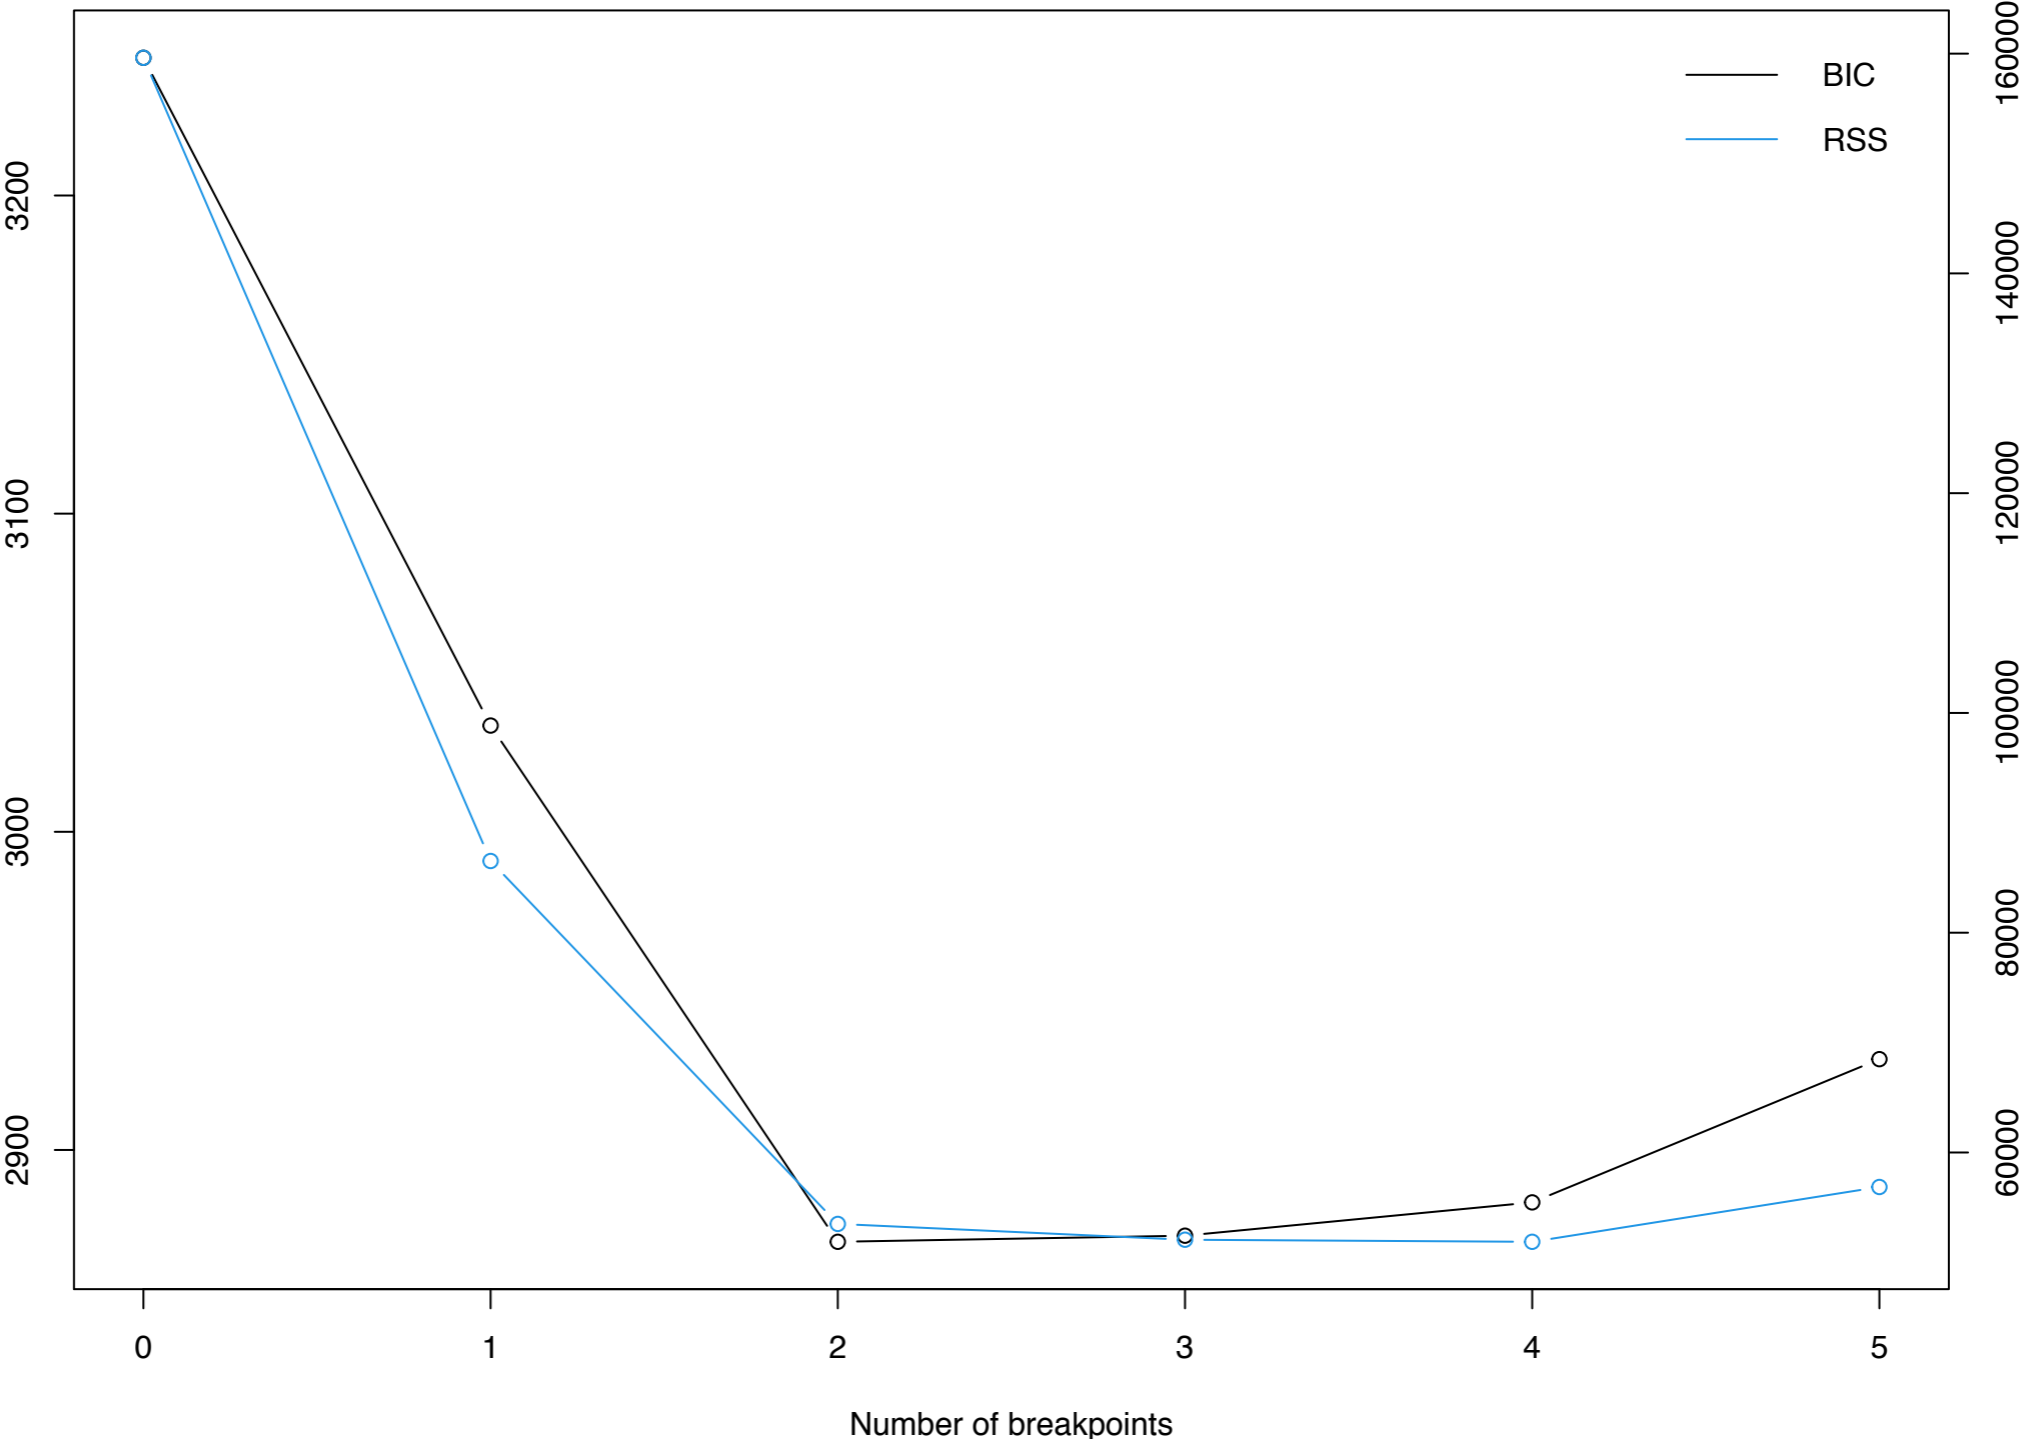

# Structural break detection for light PA

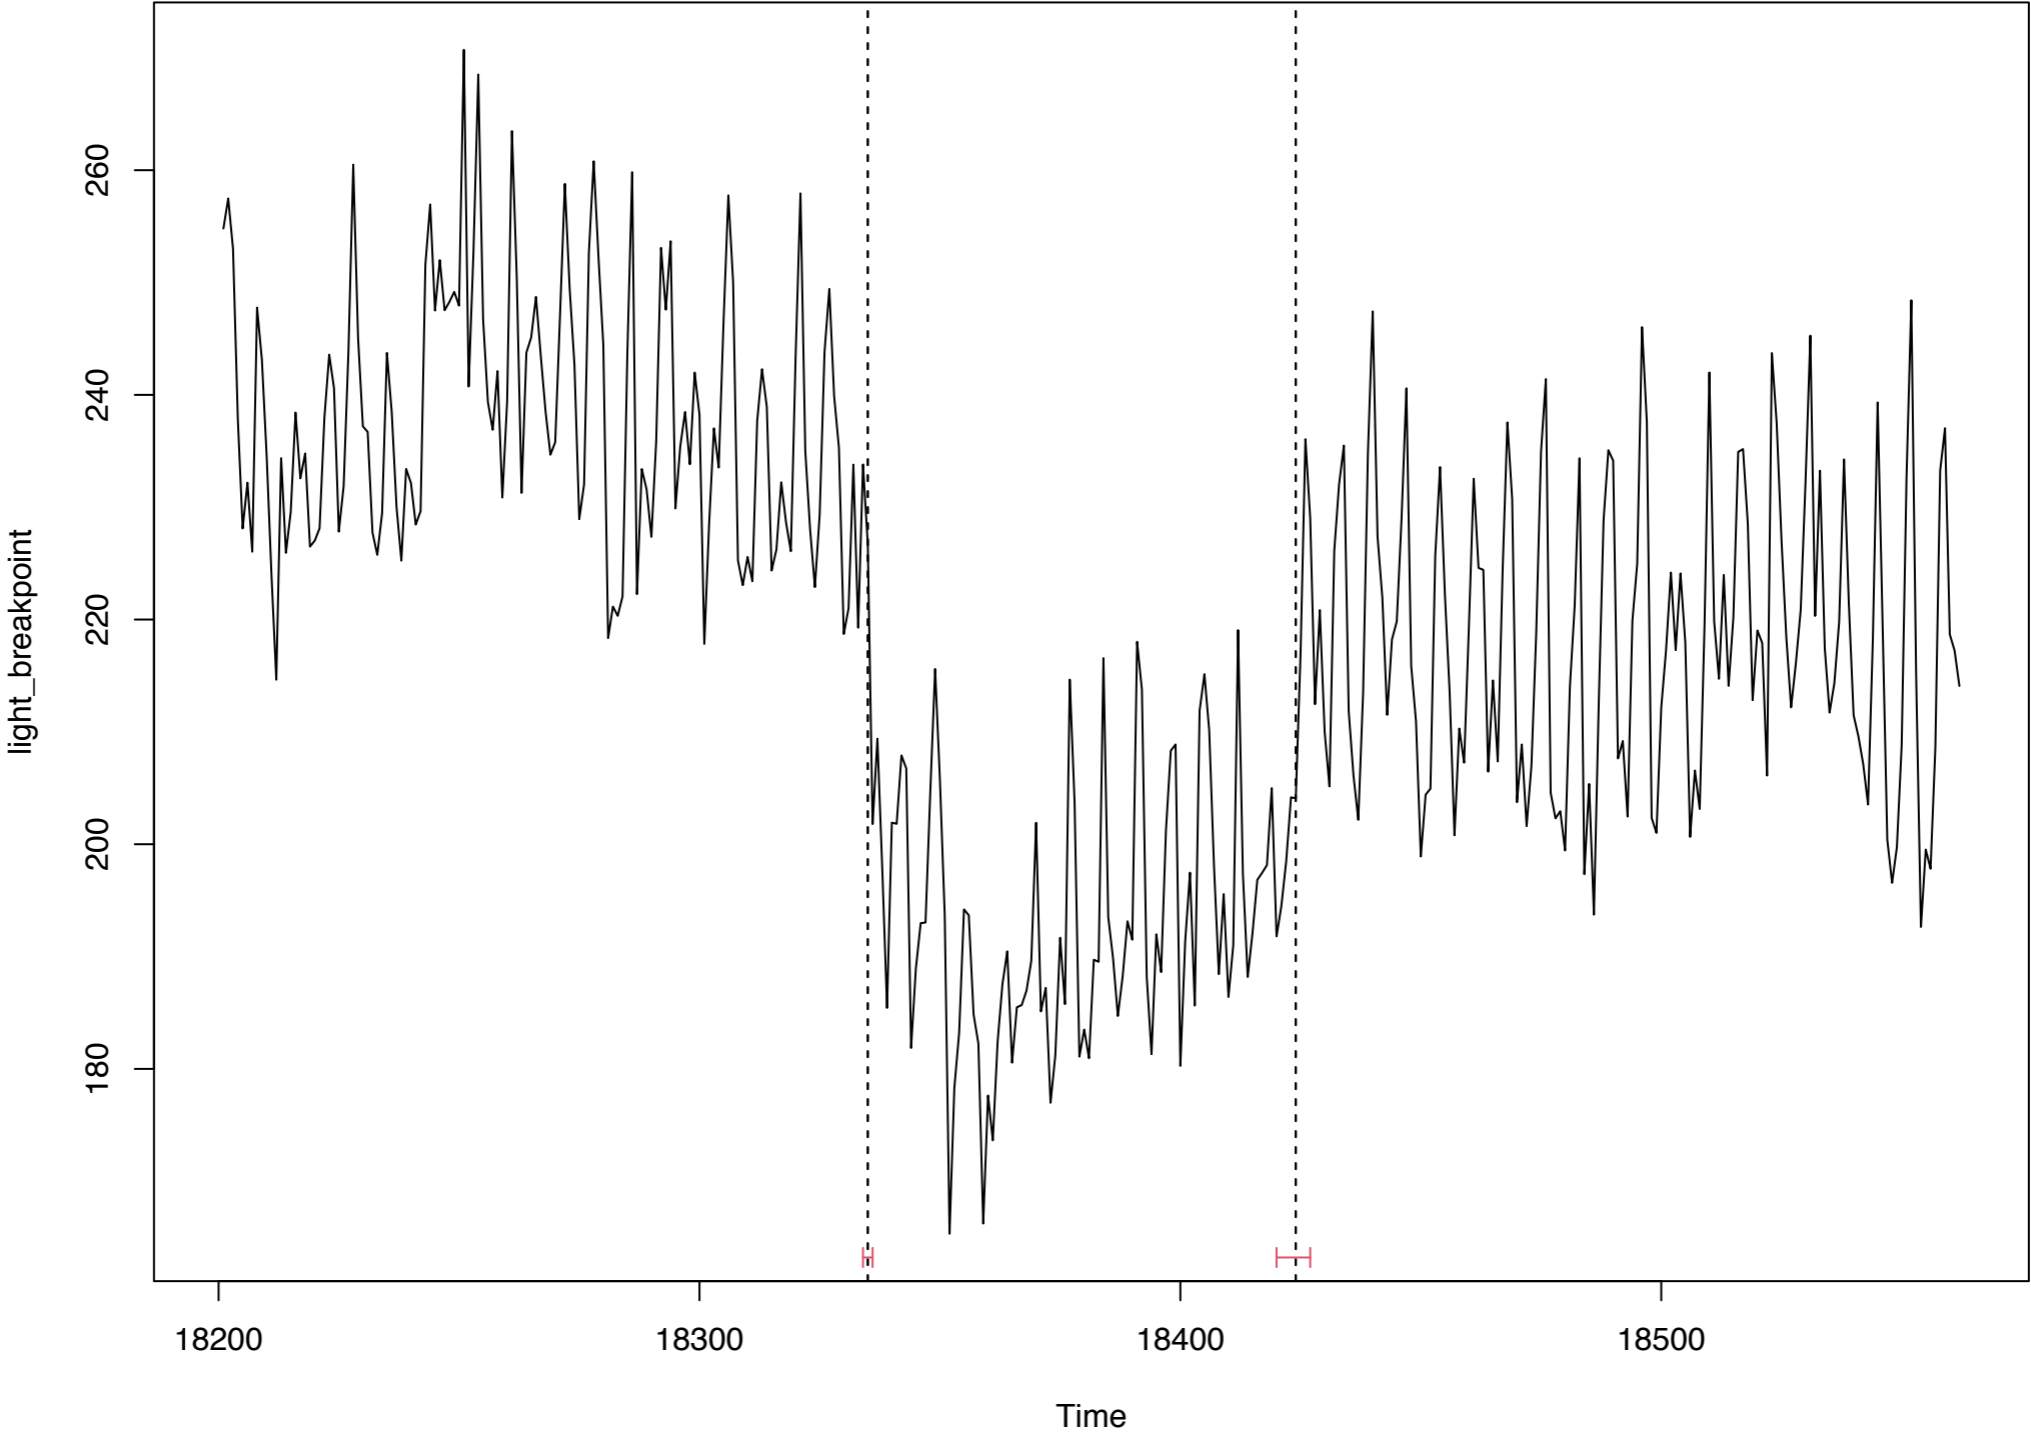

# Structural break detection for MVPA

BIC and Residual Sum of Squares

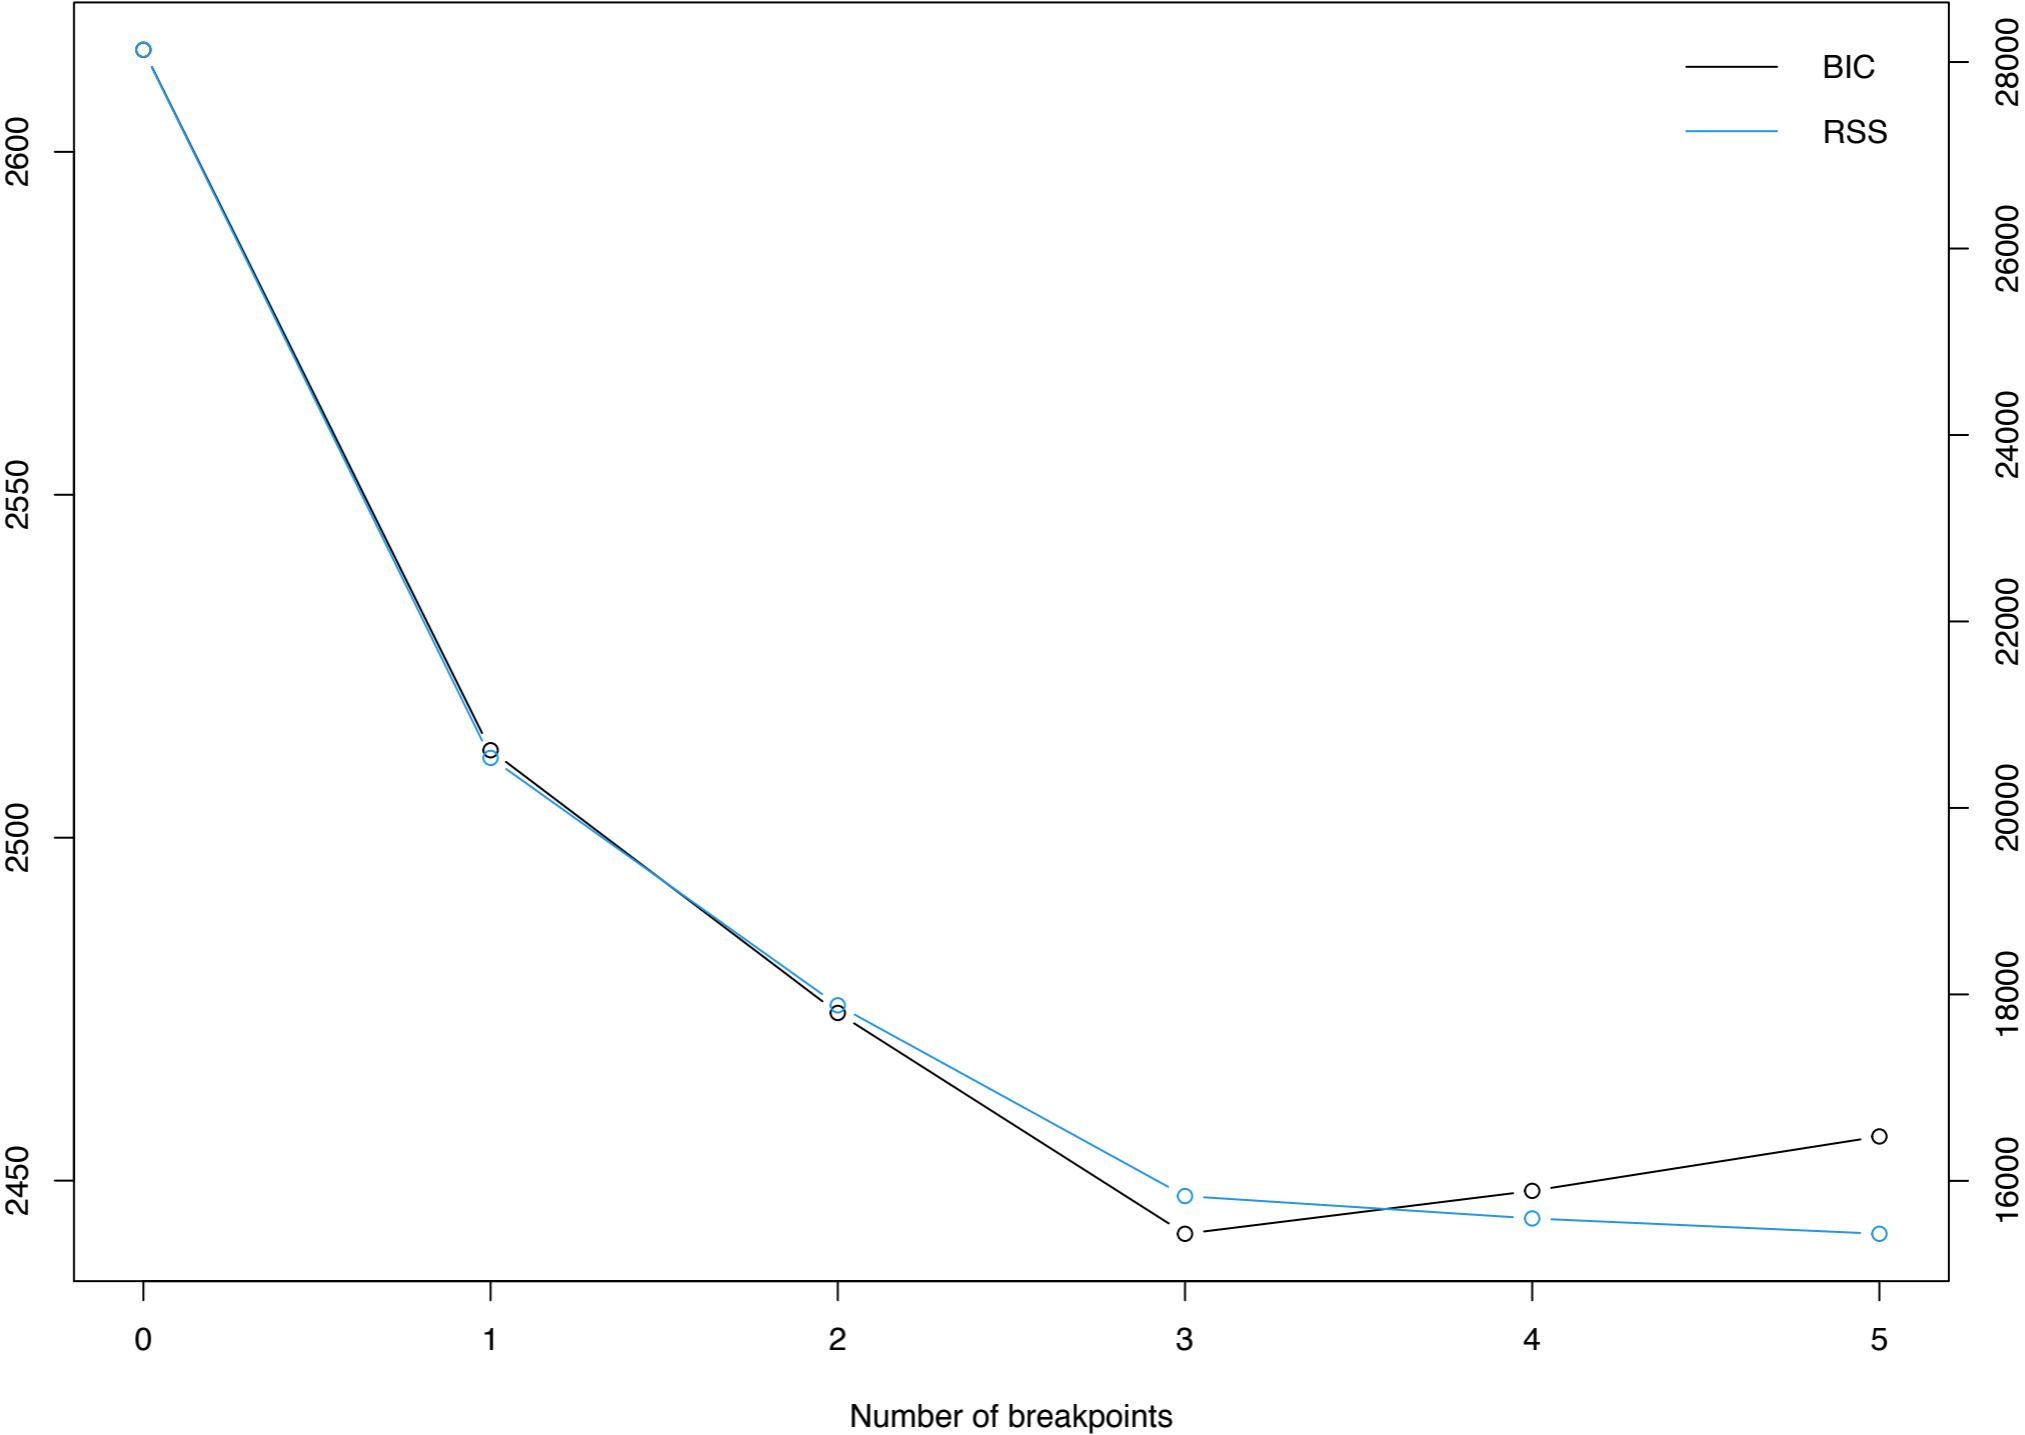

# Structural break detection for MVPA

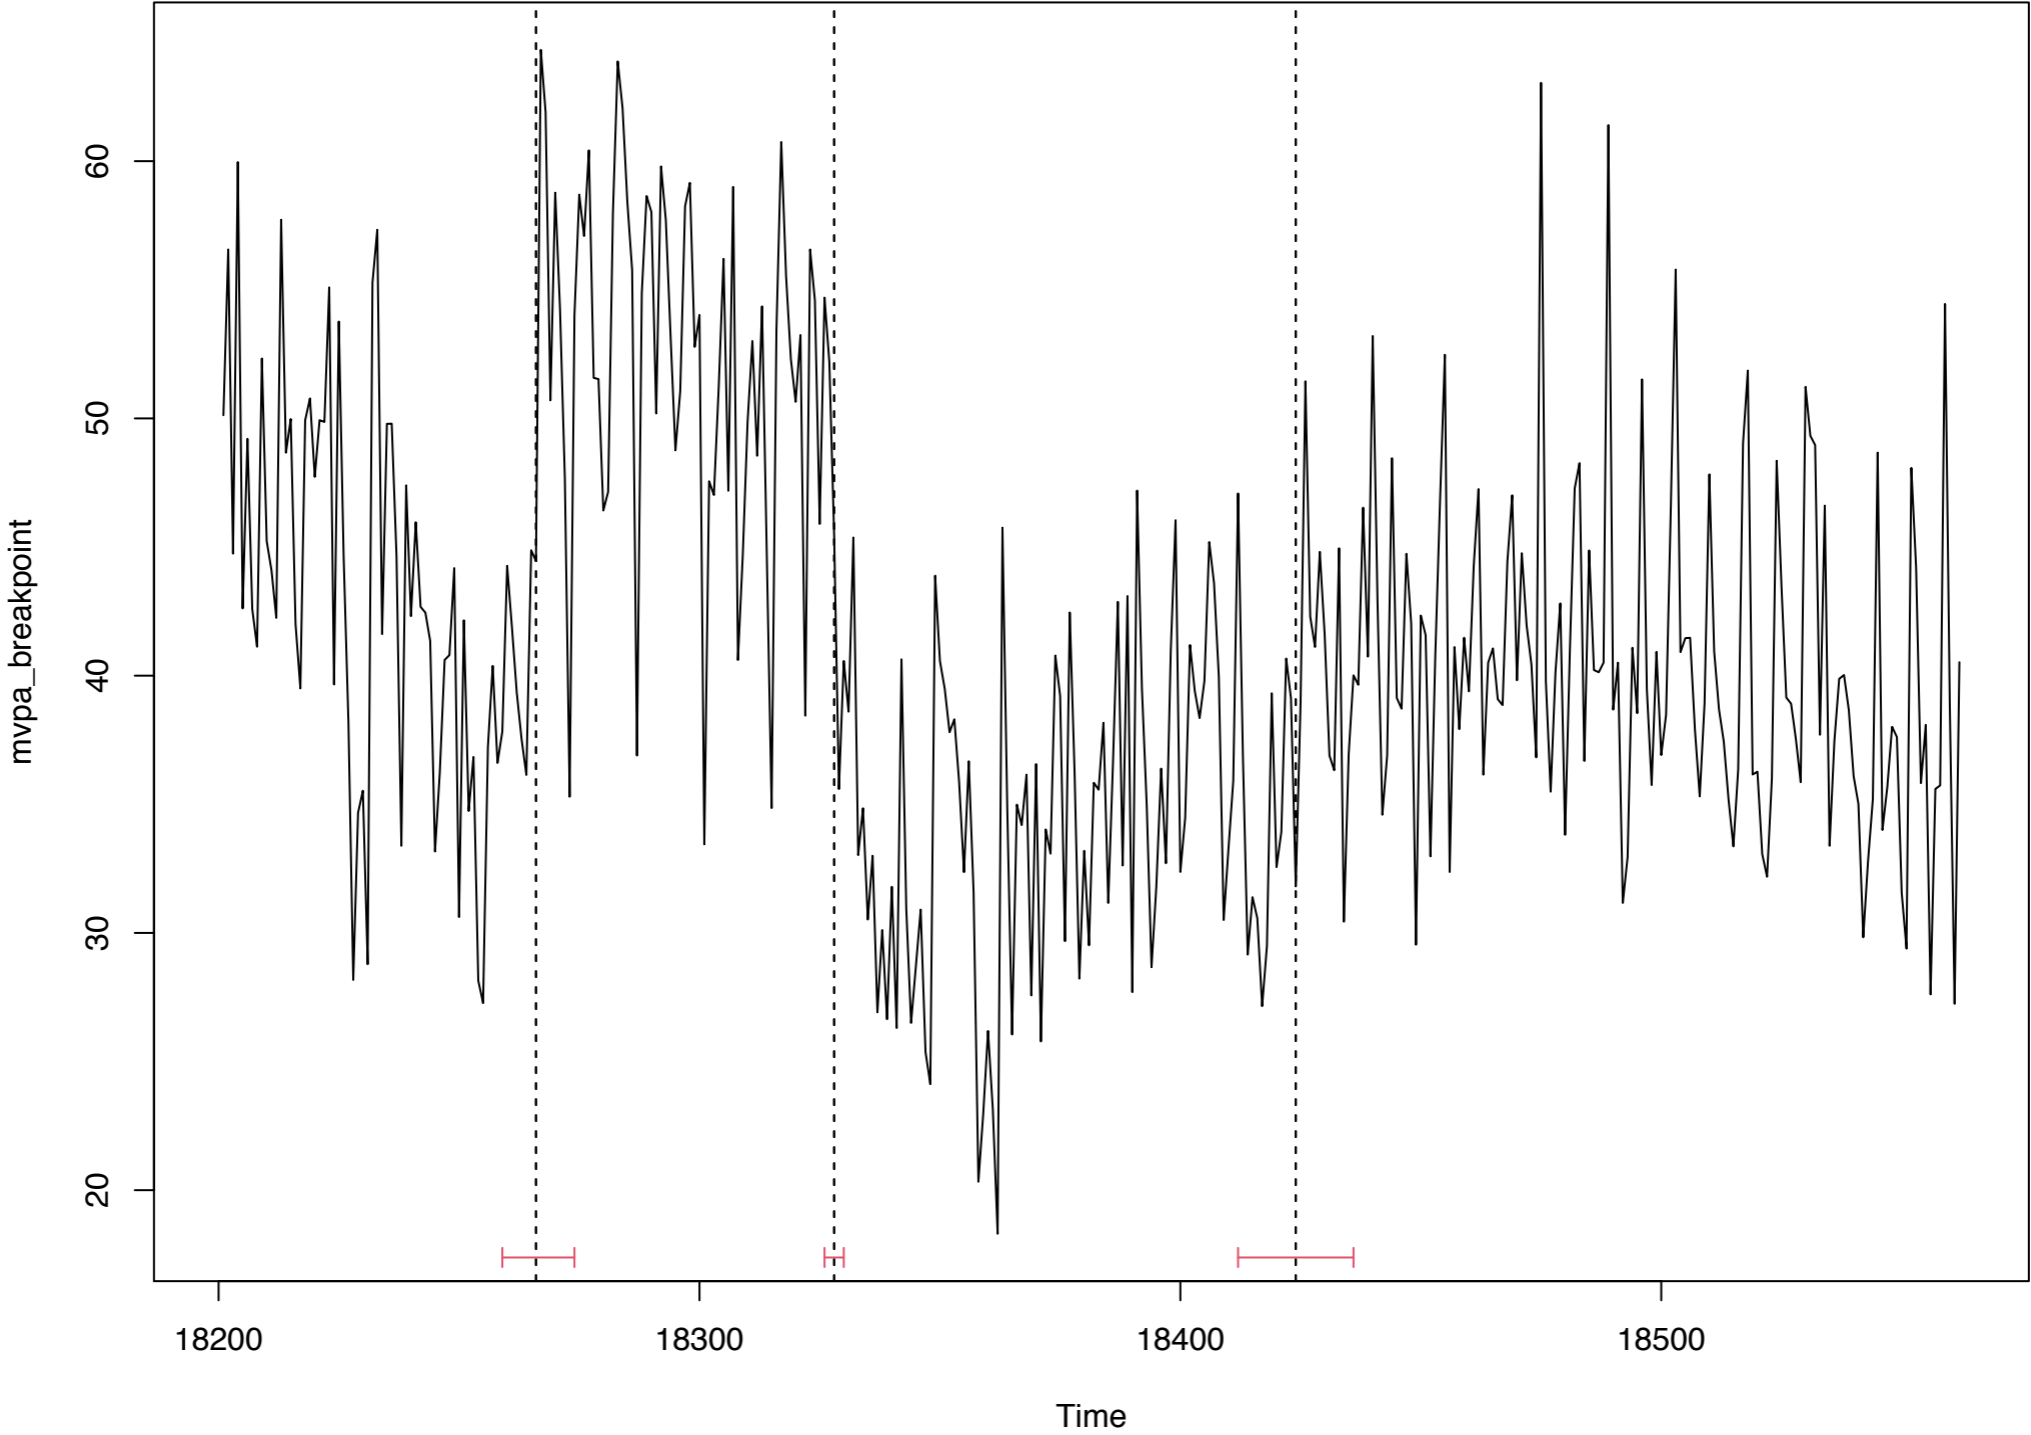

# Structural break detection for sedentary behavior

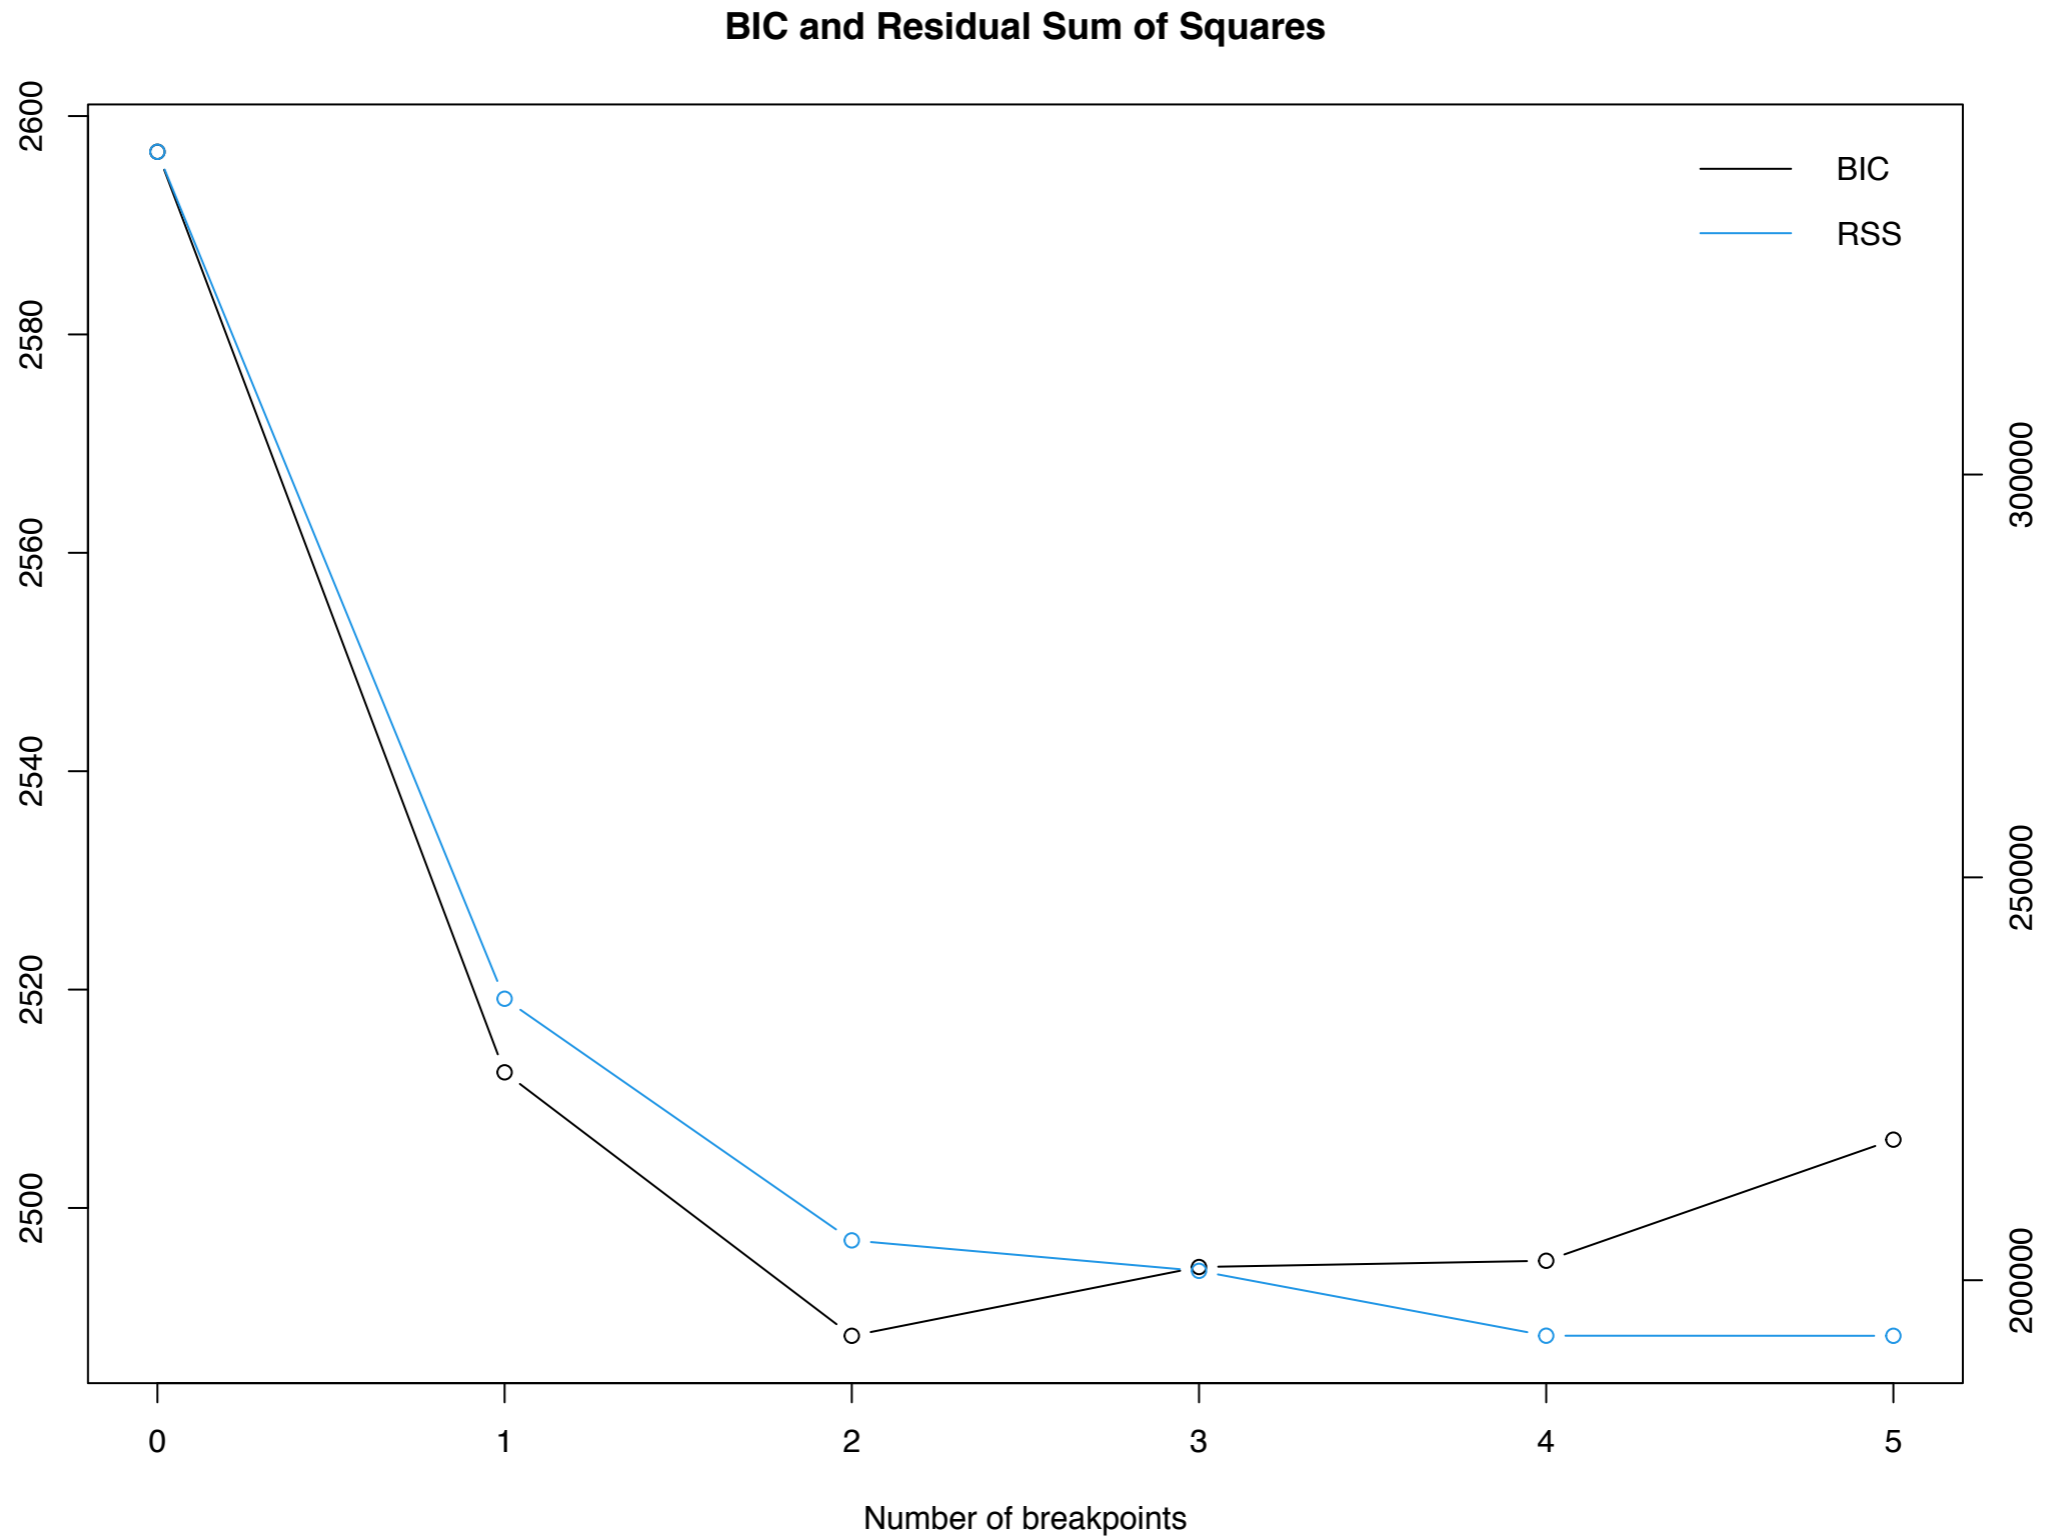

# Structural break detection for sedentary behavior

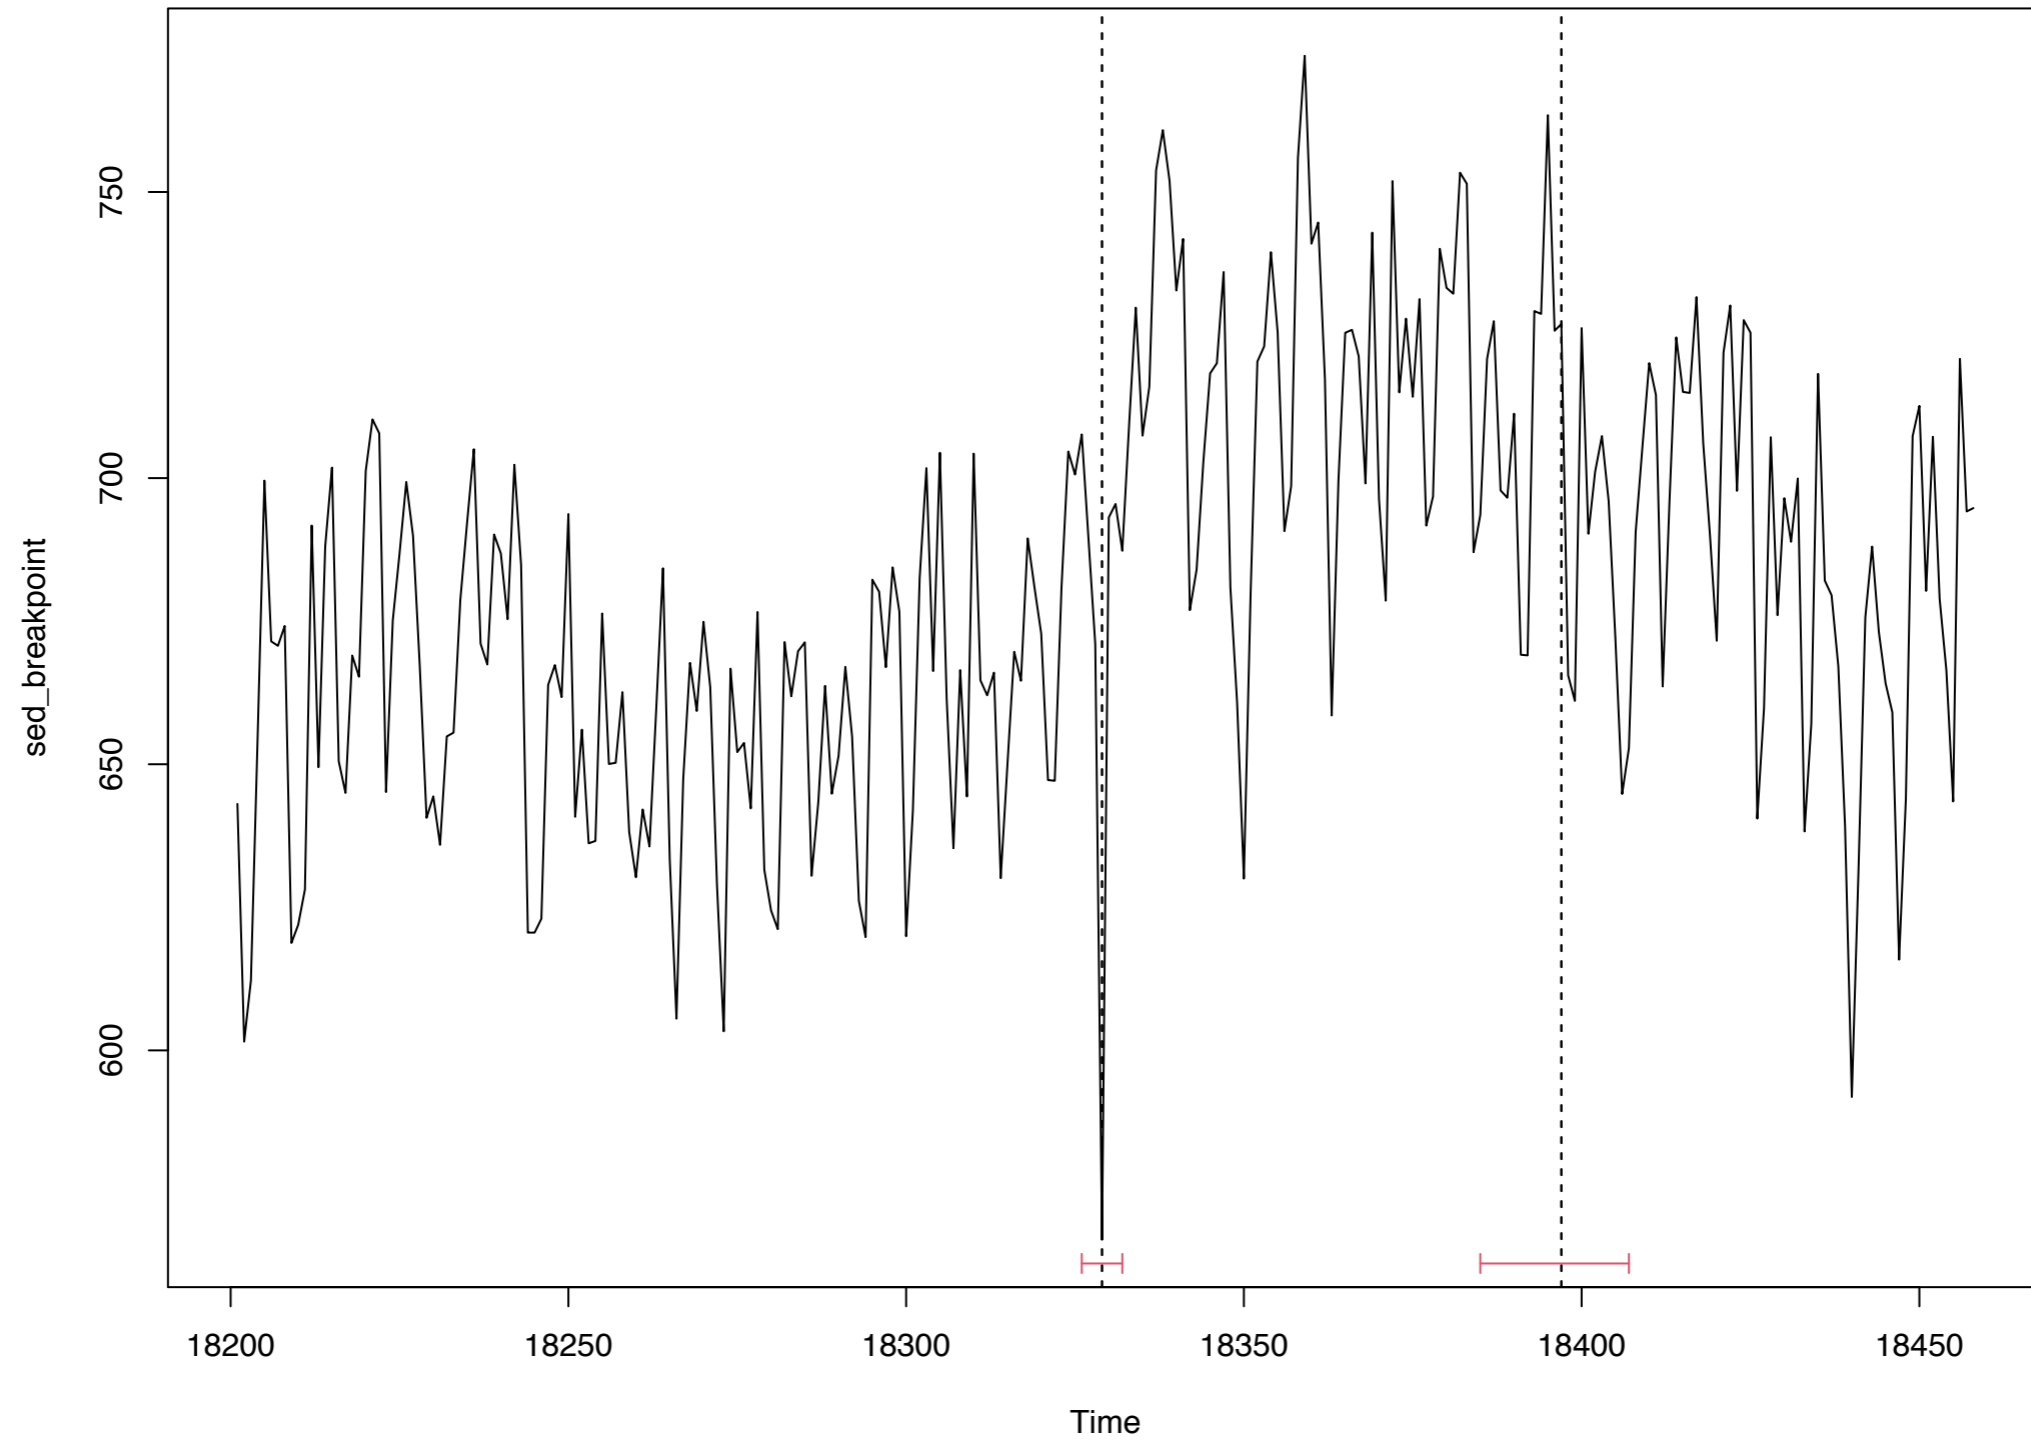

Supplement: publichealth_v7i11e28317_app1.pdf [file publichealth_v7i11e28317_app1.pdf]
