# Supplementary material for: Impact of the COVID-19 Pandemic on Objectively Measured Physical Activity and Sedentary Behavior Among Overweight Young Adults: Yearlong Longitudinal Analysis
Source: PubMed Central journal article supplement (PMC8614391; doi:10.2196/28317), 2021-11-24
Supplement: publichealth_v7i11e28317_app2.pdf [file publichealth_v7i11e28317_app2.pdf]

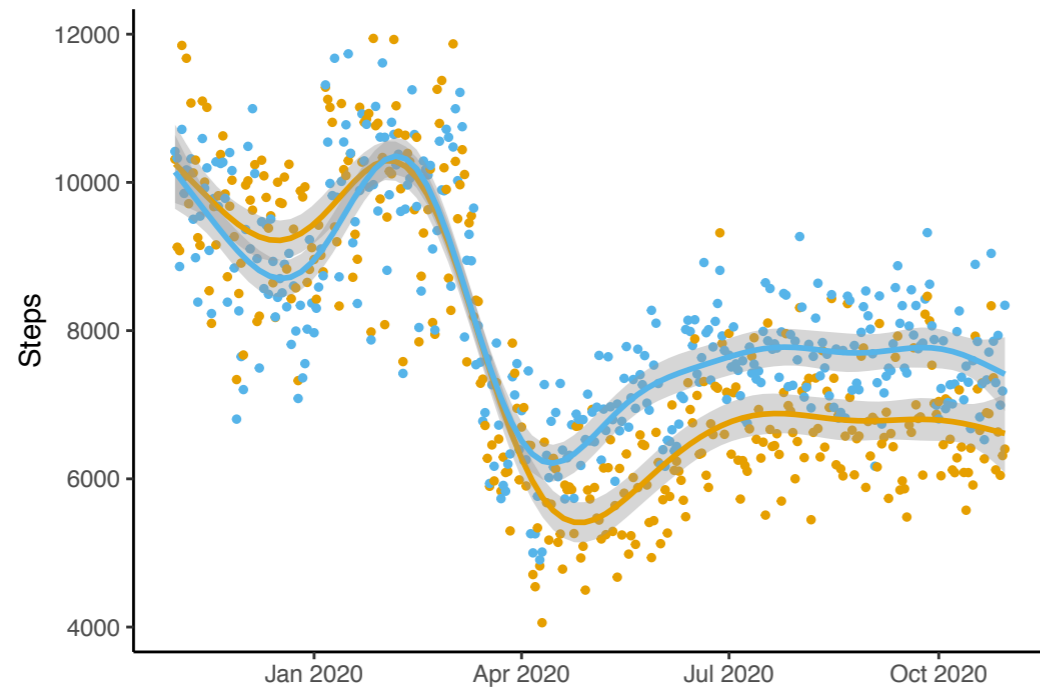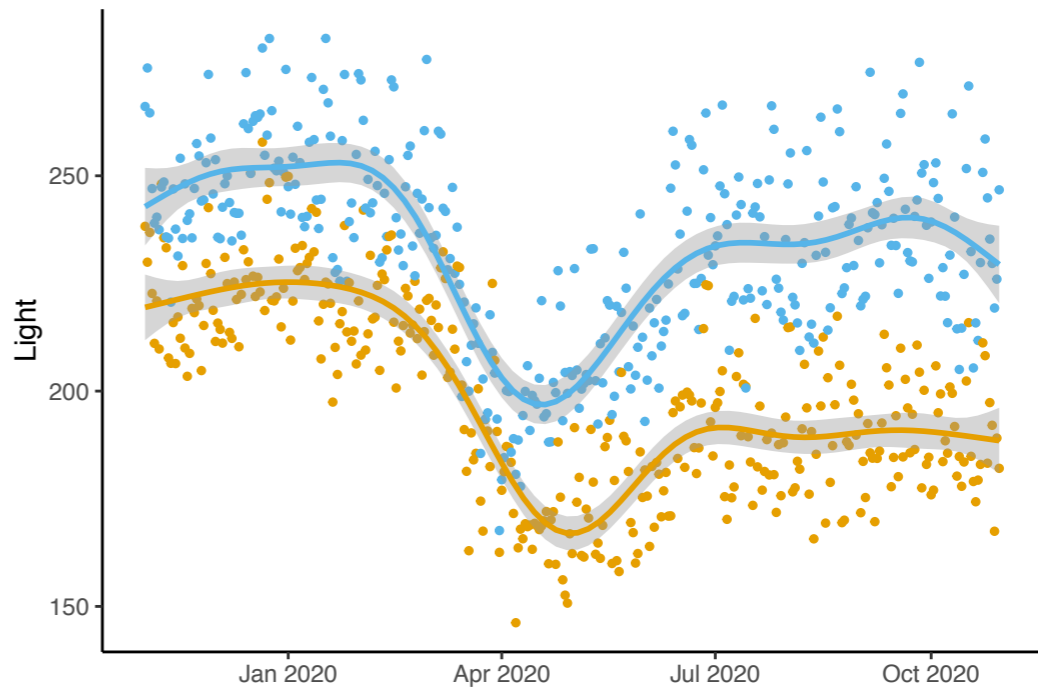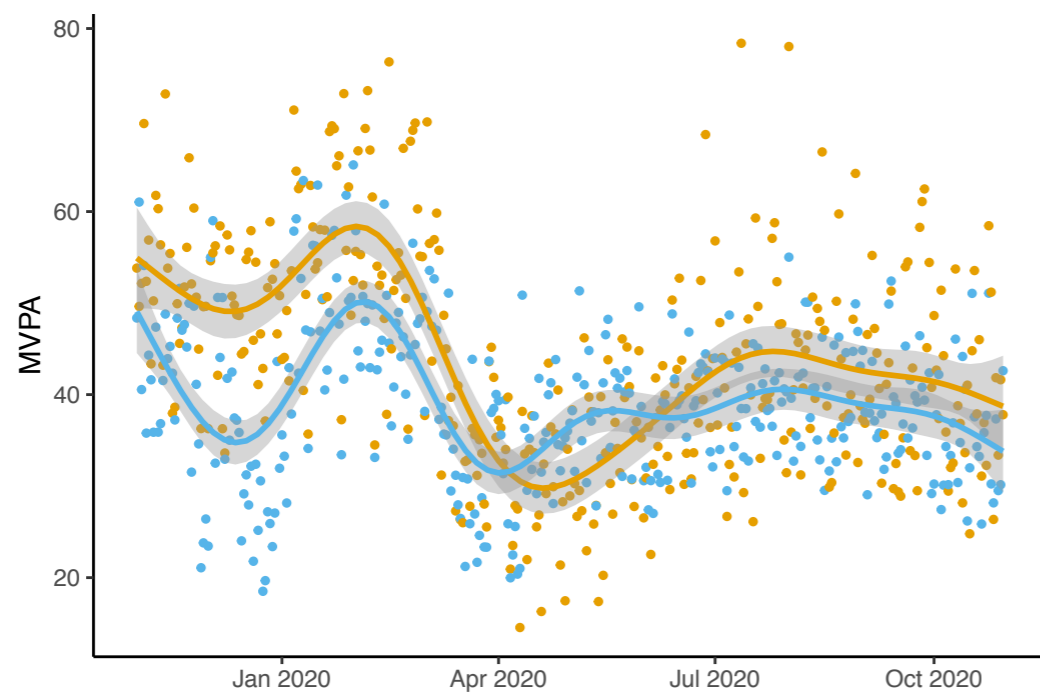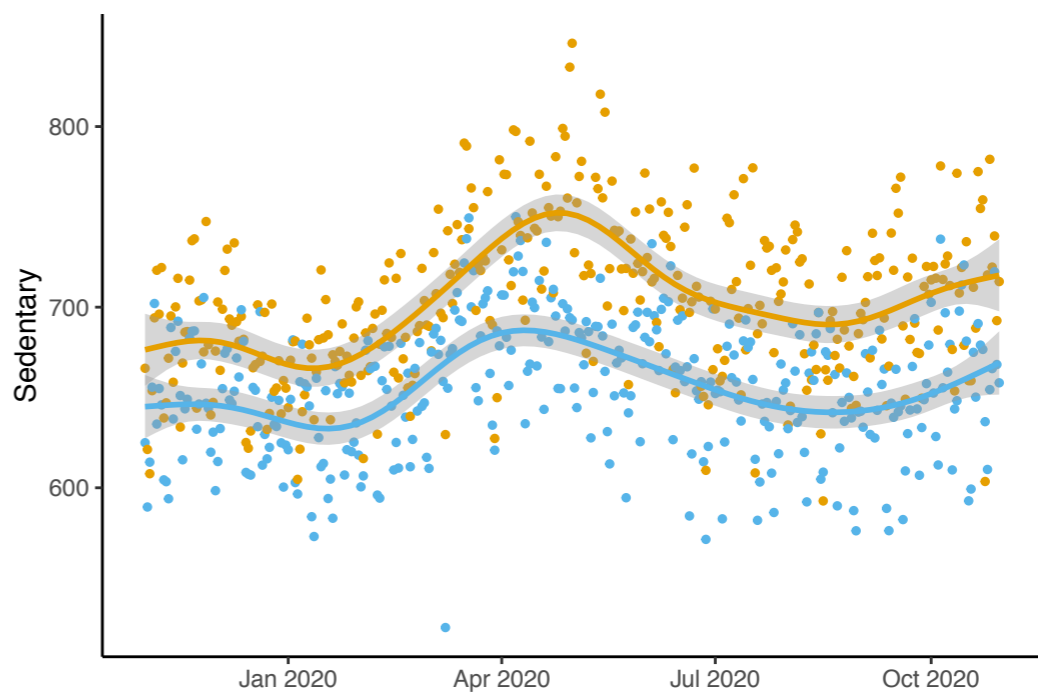

Sex — Male | N = 37 — Female | N = 58

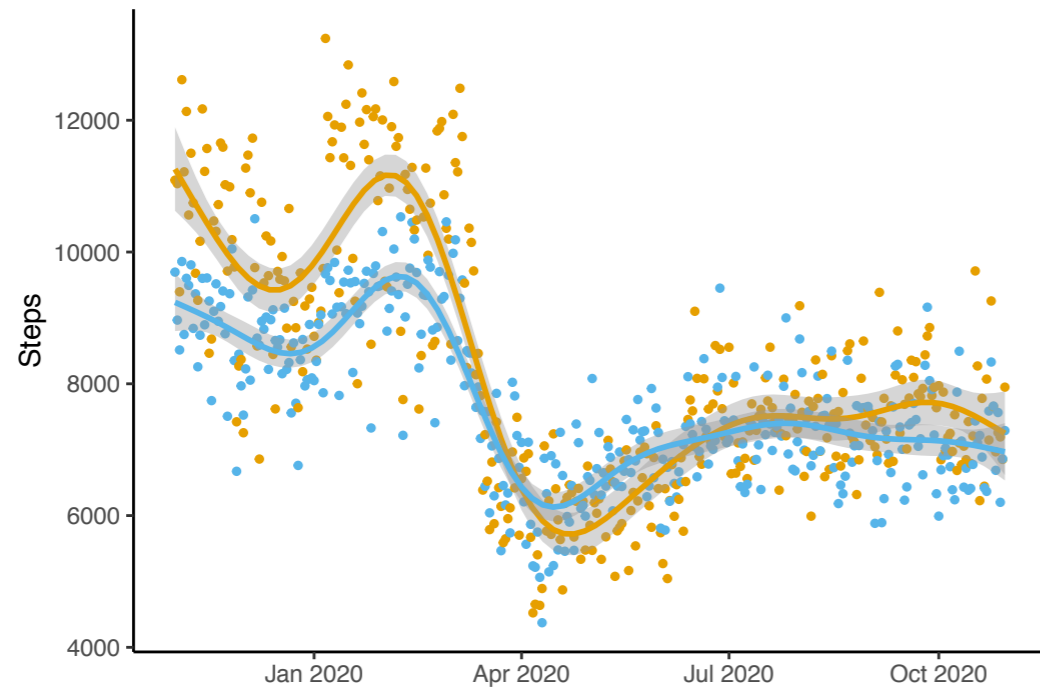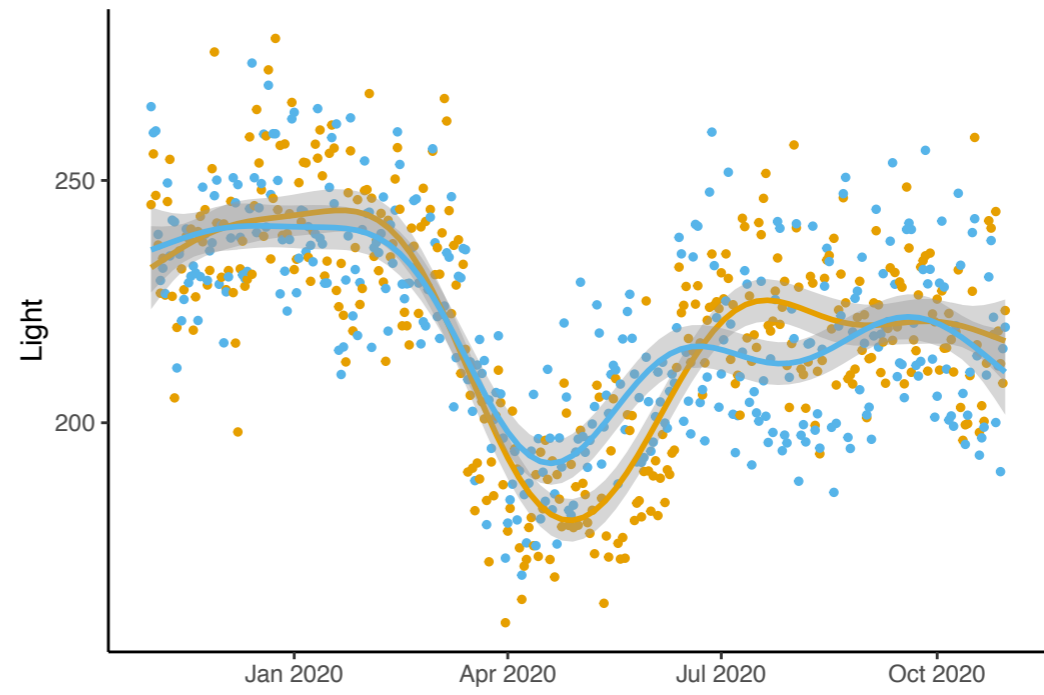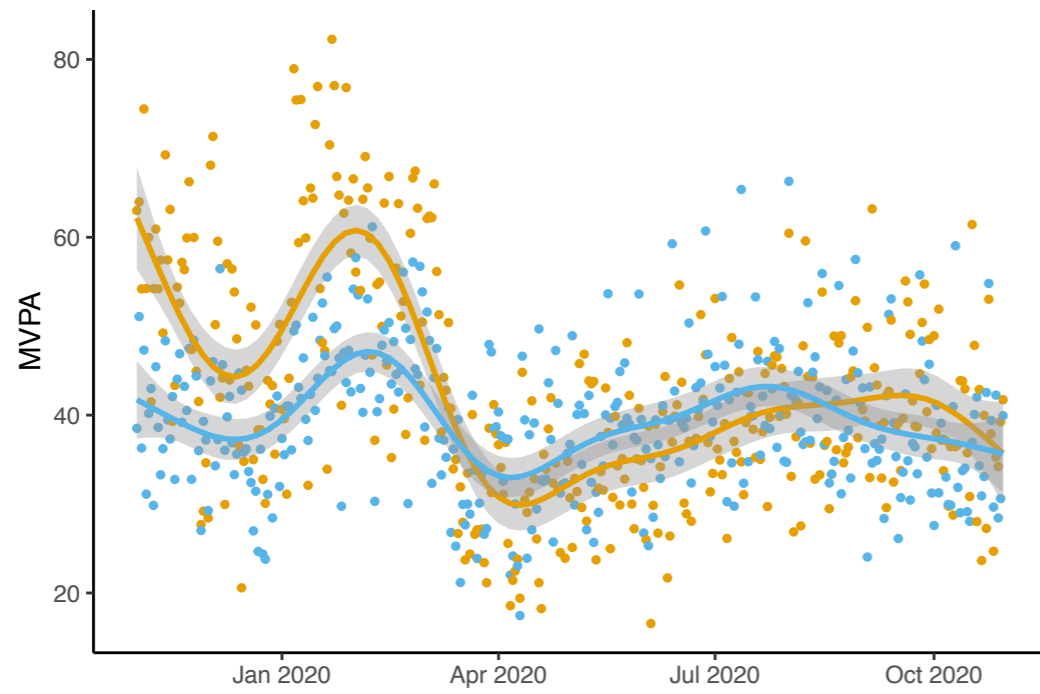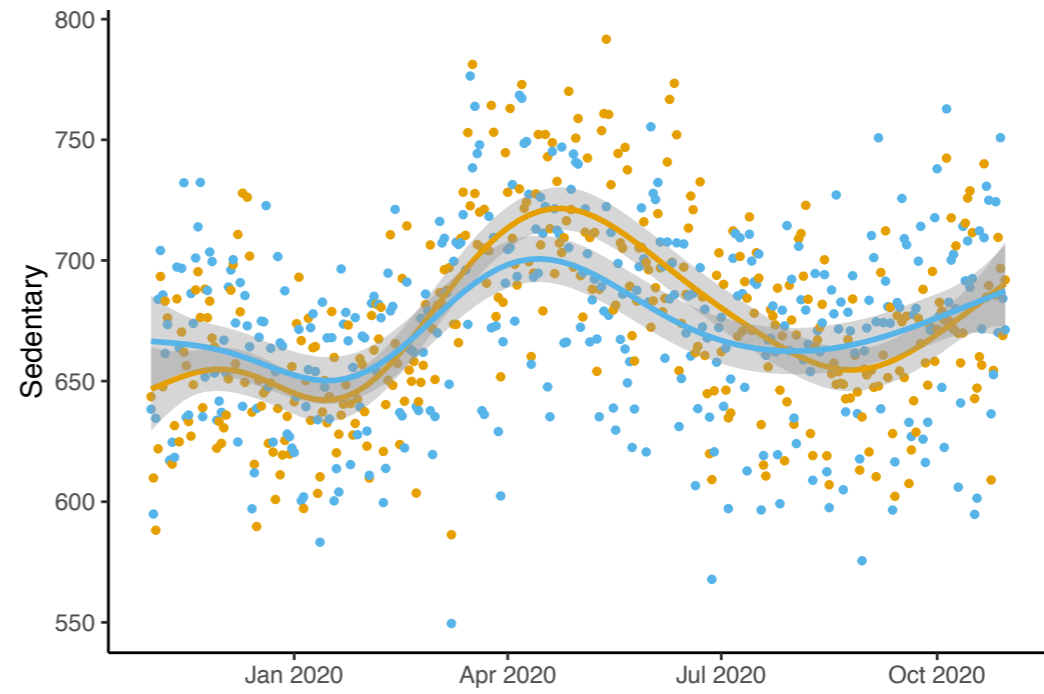

Relationship\_Binary Single | N = 44 Committed | N = 51

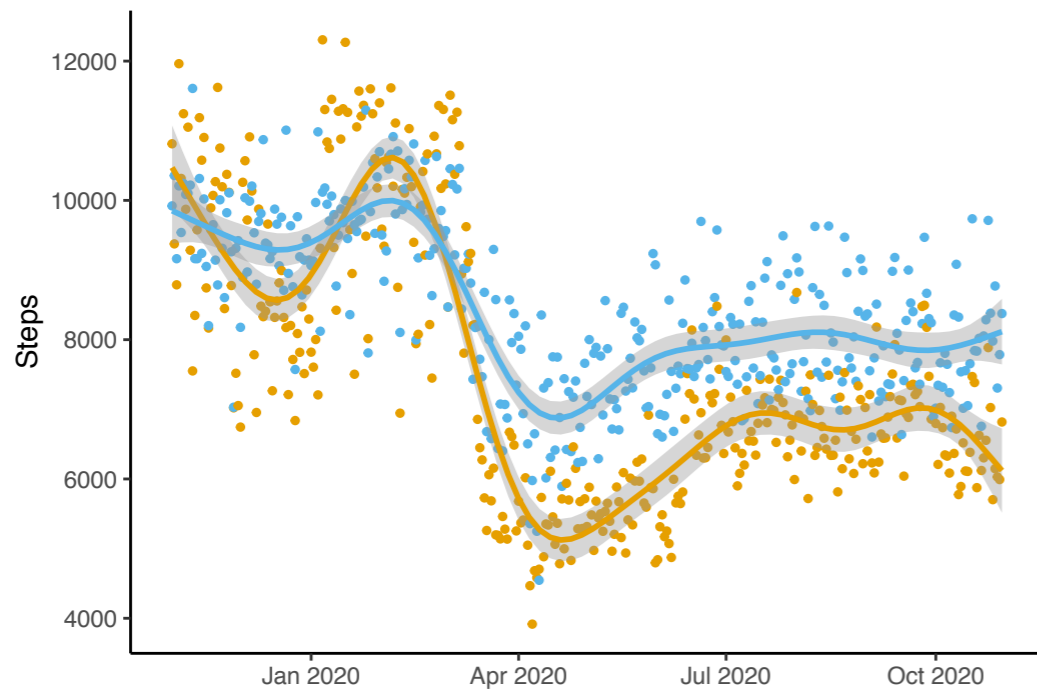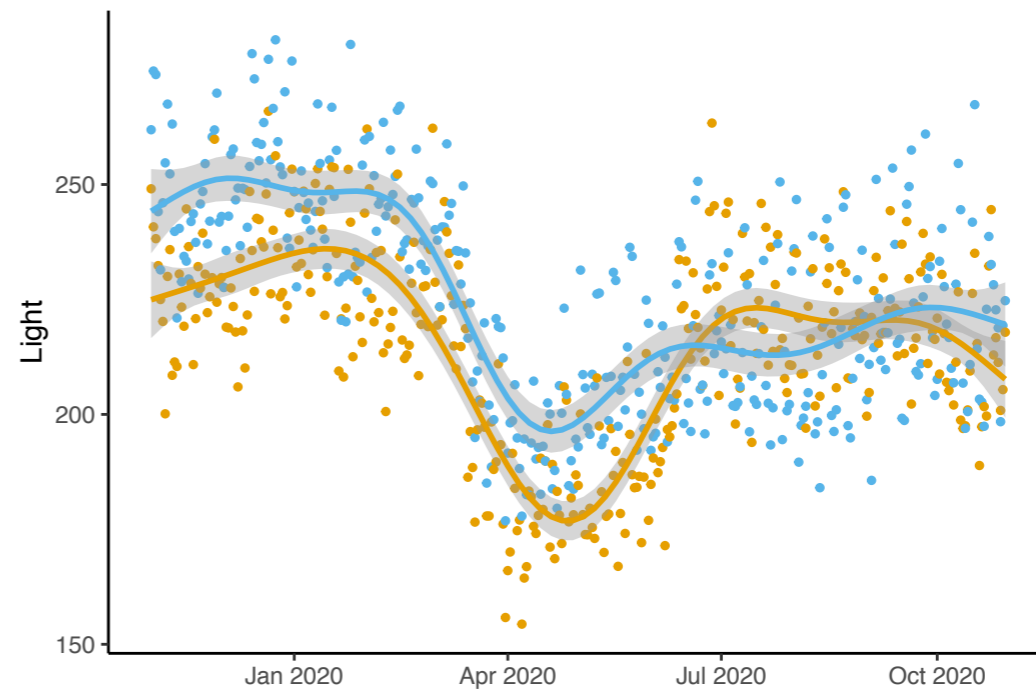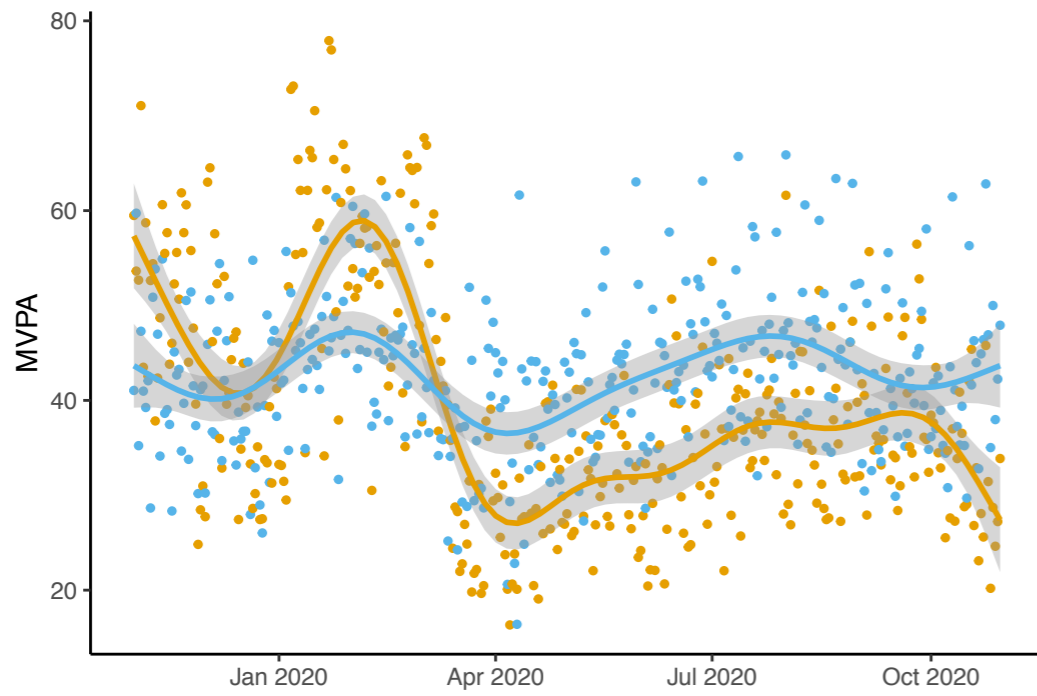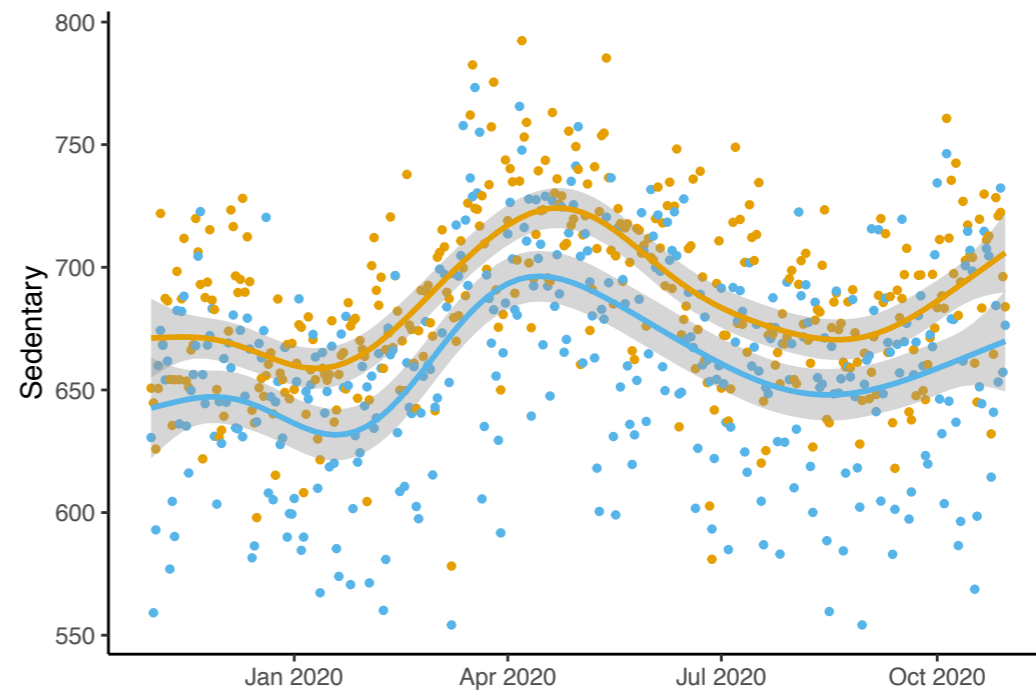

SES\_Revised  Annual incomes < 25k | N = 50  Annual incomes > 25k | N = 45

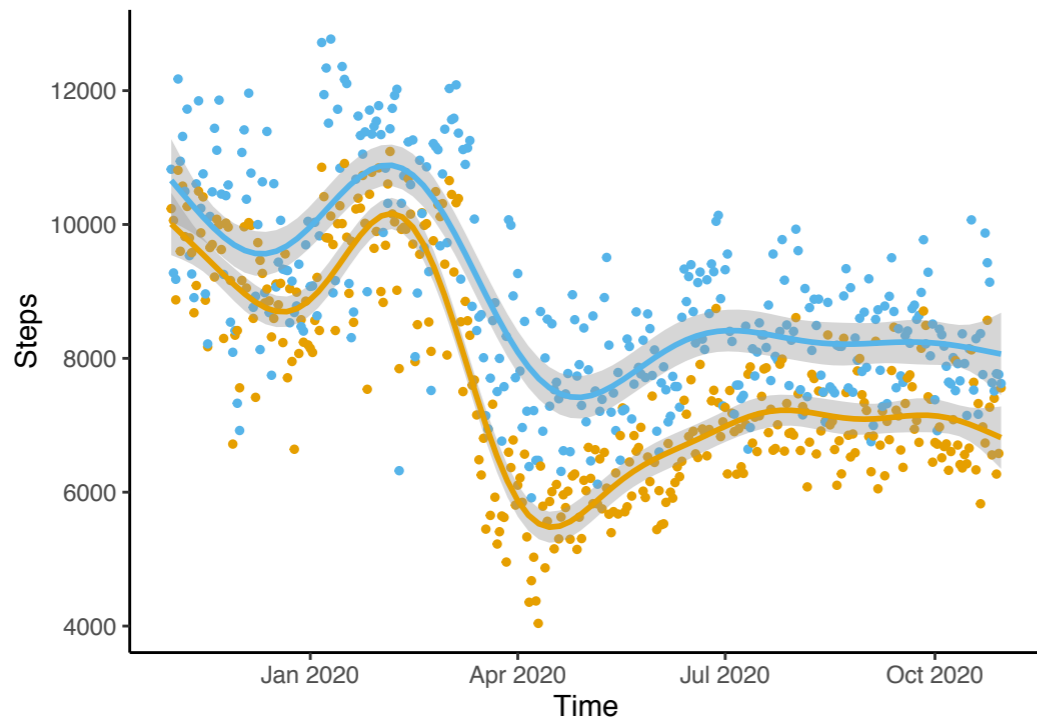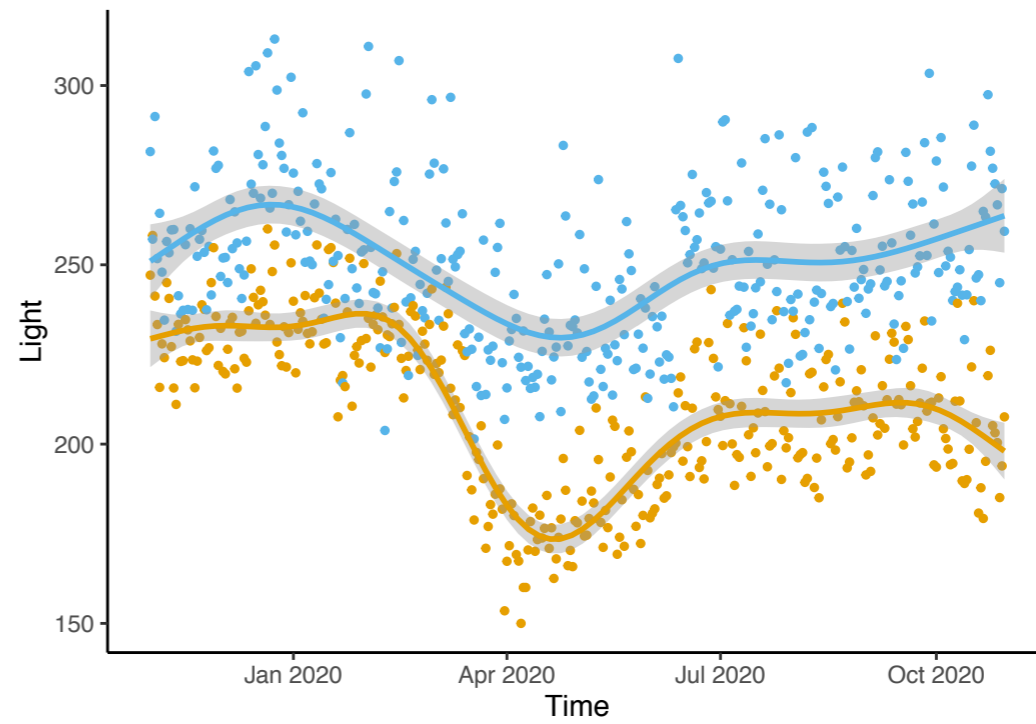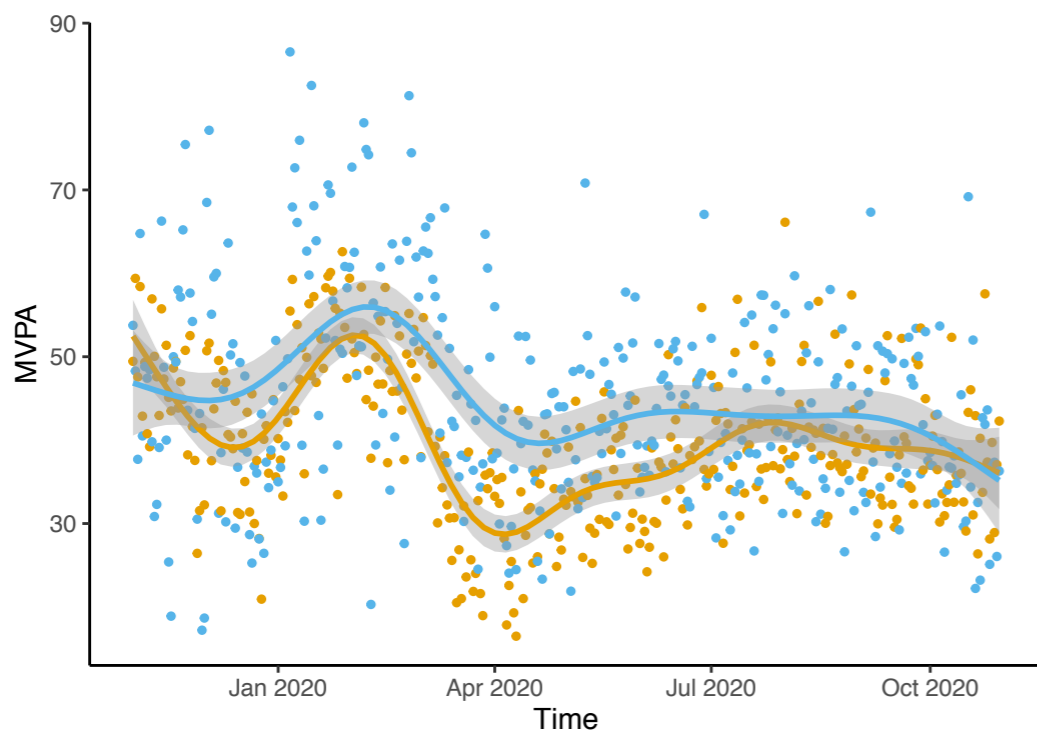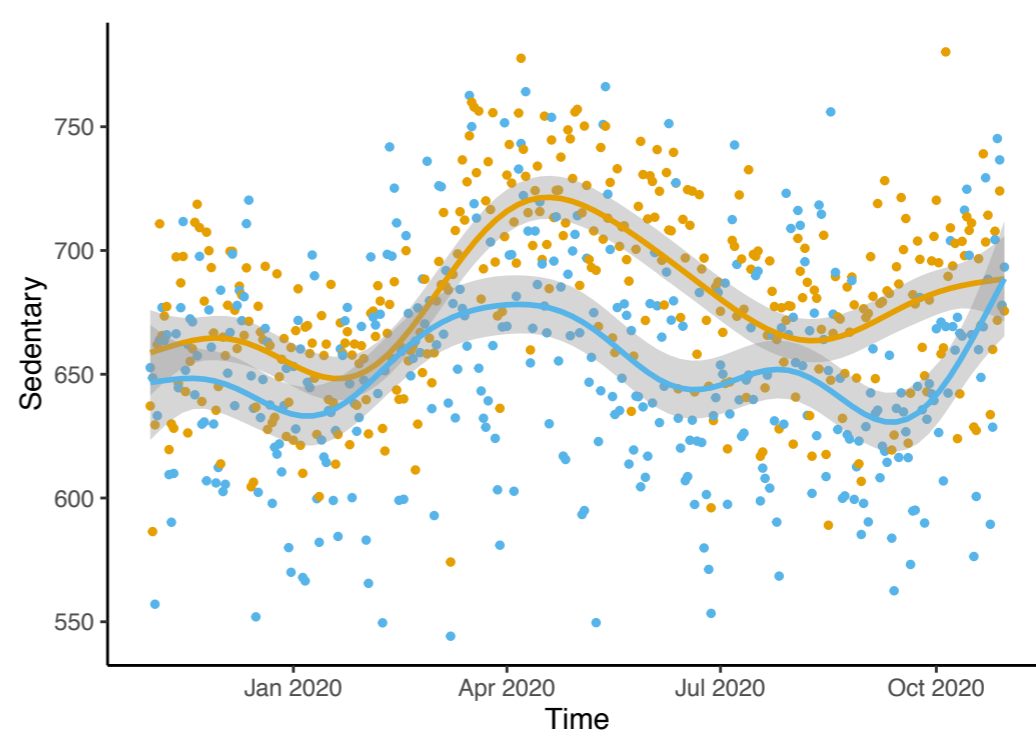

Children\_Binary — No children | N = 73 — Children | N = 22
